# Supplementary material for: Codelivery of Doxorubicin/PI3K Inhibitor Nanomicelle Linked with Phenylboronic Acid for Enhanced Cytotoxicity to Pancreatic Cancer
Source: Hindawi journal article supplement (doi:10.1155/2022/8758356), 2022-01-01
Supplement: f1 [file 8758356.f1.docx]

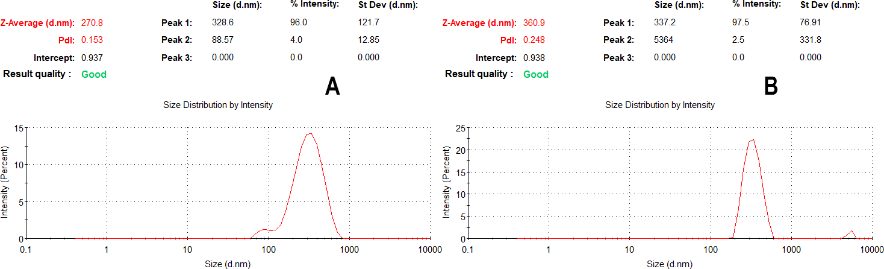


Figure S1. The size of PBA-PEG-DOX nanoparticles with different DOX feed ratio. (A) size of PBA-PEG-DOX NPs (PBA-PEG-COOH : DOX = 2.5 : 10). (B) size of PBA-PEG-DOX NPs (PBA-PEG-COOH : DOX = 3.5 : 10).


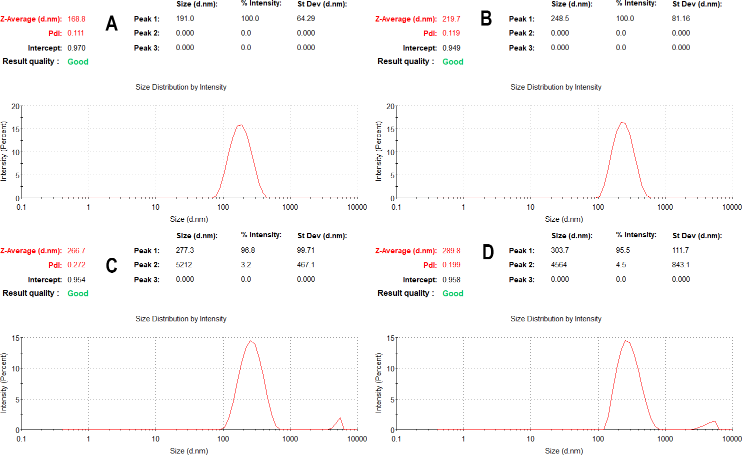


Figure S2. The size changes of the PBA-PEG-DOX nano micelle in 5 days standing at 4 ℃. A-D are the size of nanoparticles when placed for 2-5 days.
